# Supplementary material
Source: PubMed Central journal article supplement (PMC64958)

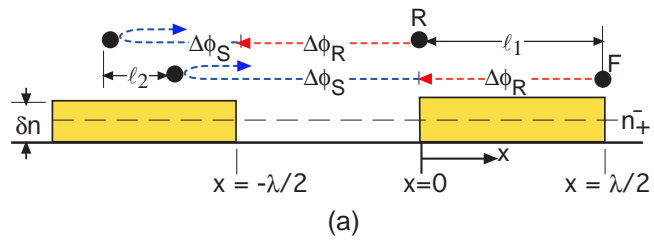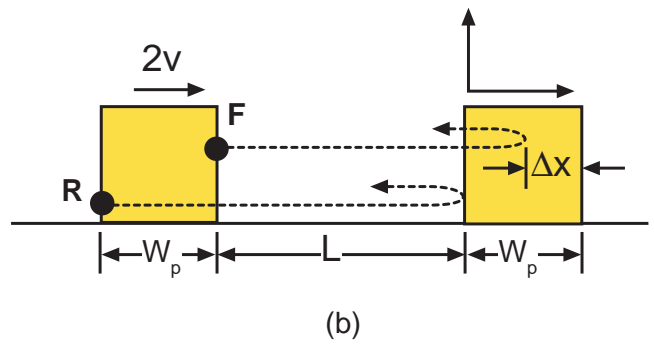

Supplement: pnas_98_26_14913__10.pdf [file pnas_98_26_14913__10.pdf]

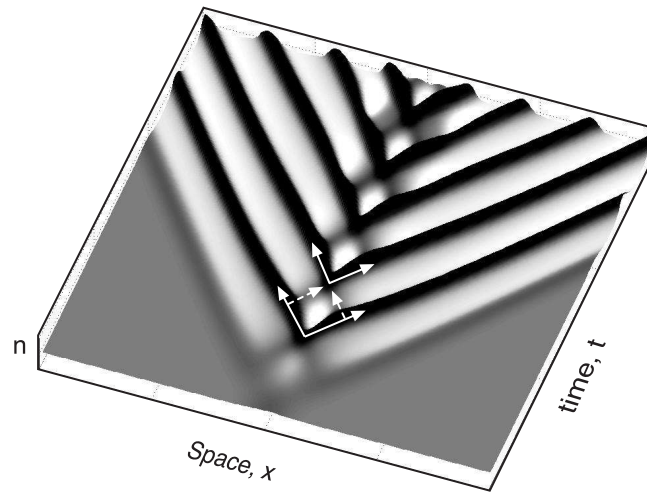

Supplement: pnas_98_26_14913__11.pdf [file pnas_98_26_14913__11.pdf]

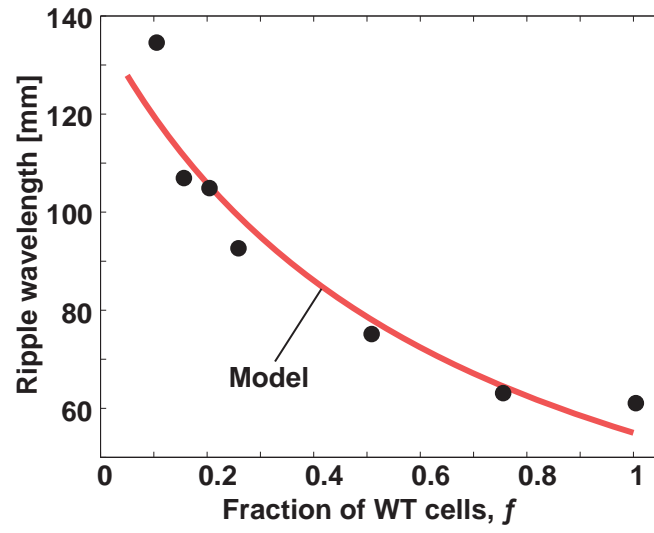

(a)

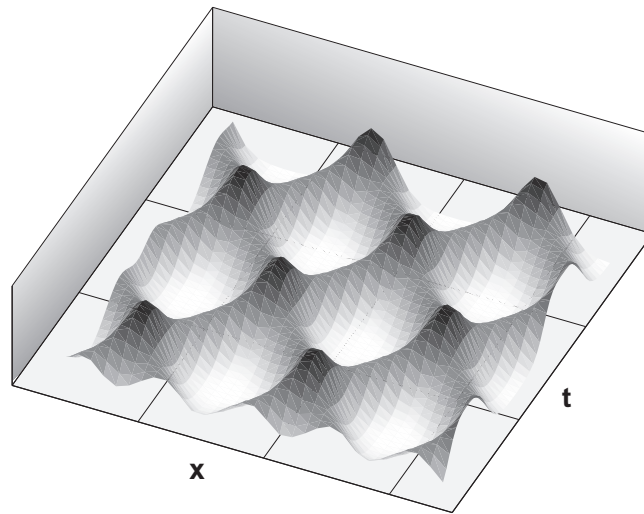

(b)

Supplement: pnas_98_26_14913__12.pdf [file pnas_98_26_14913__12.pdf]
